# Supplementary material for: Developing citizen report cards for primary health care in low and middle-income countries: Results from cognitive interviews in rural Tajikistan
Source: PLOS journal article supplement (doi:10.1371/journal.pone.0186745), 2017-10-24
Supplement: S3 (10.1371/journal.pone.0186745.s003) [file journal.pone.0186745.s003]

**S1 Table. Sample for cognitive interviews (counts).**

| <b>Province</b> | <b>Gender</b> | <b>Age 18-45</b> | <b>Age 46+</b> |
|-----------------|---------------|------------------|----------------|
| Khatlon         | Male          | 5                | 5              |
| Khatlon         | Female        | 5                | 5              |
| Soghd           | Male          | 5                | 5              |
| Soghd           | Female        | 5                | 5              |
| Total           | Male          | 10               | 10             |
| Total           | Female        | 10               | 10             |
